# Supplementary material for: Secondary organic aerosol formation from idling gasoline passenger vehicle emissions investigated in a smog chamber
Source: Copernicus journal article supplement (doi:10.5194/acp-13-6101-2013), 2013-06-28
Supplement: Supplementary file 1 [file acp-13-6101-2013-supplement.pdf]

1 **Supplement for "Secondary organic aerosol**  
2 **formation from idling gasoline passenger vehicle**  
3 **emissions investigated in a smog chamber"**

4

5 **E. Z. Nordin<sup>1</sup>, A. C. Eriksson<sup>2</sup>, P. Roldin<sup>2</sup>, P. T. Nilsson<sup>1</sup>, J. E. Carlsson<sup>1</sup>, M. K.**  
6 **Kajos<sup>3</sup>, H. Hellén<sup>4</sup>, C. Wittbom<sup>2</sup>, J. Rissler<sup>1</sup>, J. Löndahl<sup>1</sup>, E. Swietlicki<sup>2</sup>, B.**  
7 **Svenningsson<sup>2</sup>, M. Bohgard<sup>1</sup>, M. Kulmala<sup>2,3</sup>, M. Hallquist<sup>5</sup> and J. H. Pagels<sup>1</sup>**

8

9 [1]{Ergonomics and Aerosol Technology, Lund University, P.O. Box 118, SE-221 00 Lund,  
10 Sweden}

11 [2]{Division of Nuclear Physics, Lund University, P.O. Box 118, SE-221 00 Lund, Sweden}

12 [3]{Department of Physic, University of Helsinki, P.O. Box 64, FIN-00014 Helsinki,  
13 Finland}

14 [4]{Finnish Meteorological Institute P.O. Box 503, FIN-00101 Helsinki, Finland}

15 [5]{Department of Chemistry, Atmospheric Science, University of Gothenburg, SE-412 96  
16 Gothenburg, Sweden}

17 Correspondence to E. Z. Nordin (erik.nordin@design.lth.se)

18

19

20

21

22

23

24

25

26

27

## 1 **Methods and material**

### 2 **Heated inlet system**

3 The raw exhaust was sampled from the exhaust pipe using a partial flow technique. The  
4 sample was taken through a flexible stainless steel tube with a length of 1.5 m and an inner  
5 diameter of 20 mm. The flexible tube was heated to 80 °C, which was higher than the exhaust  
6 temperature (typically 70 °C). Downstream the ejector the diluted exhaust was transferred to  
7 the smog chamber in a stainless steel pipe heated to 120 °C. The length of this pipe was 6 m  
8 and the inner diameter was 10 mm.

### 9 **UV-spectrum**

10

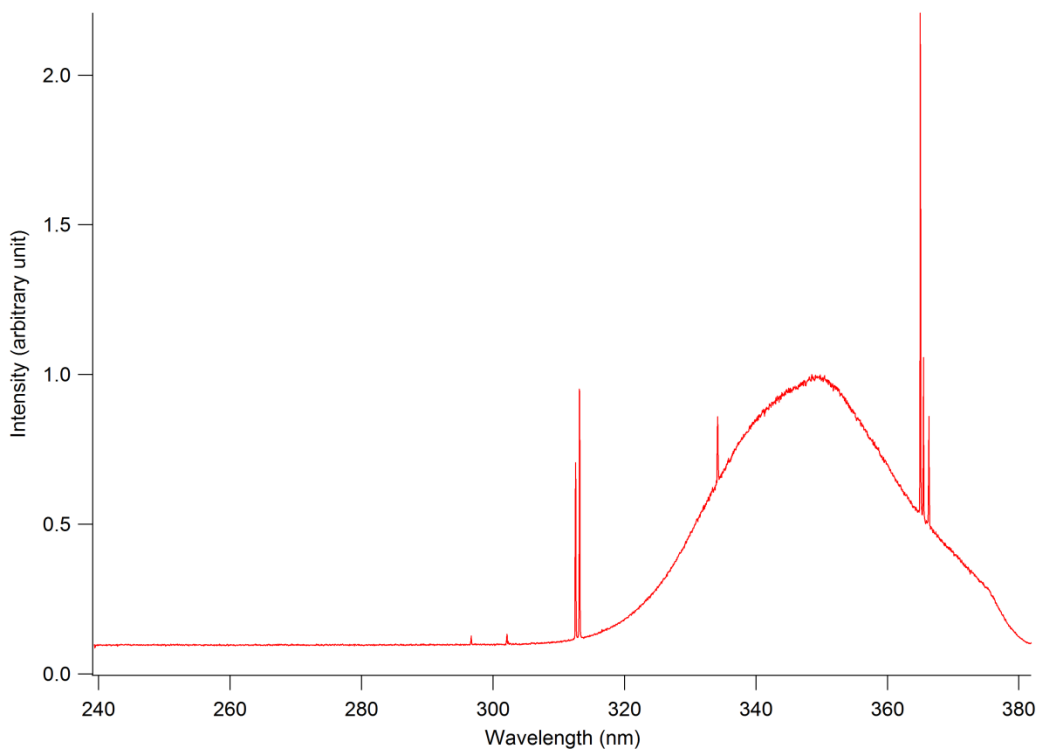

11

12 Figure S1. The measured UV-intensity spectrum from the black-lights used in the smog  
13 chamber.

### 14 **Cleaning of the Teflon chamber**

15 After a finished experiment the smog chamber was purged with filtered pressurized air. After  
16 this the chamber was cleaned with >1 ppm ozone for at least 5 h. During the cleaning  
17 procedure the UV-radiation was operated in 30 minute cycles without chamber cooling,

1 raising the smog chamber temperature to above 40 °C. This facilitates evaporation and  
2 degradation of organic contaminants on the chamber walls. The chamber was finally purged  
3 with dry pressurized air for several hours. Before each experiment, particle (AMS, SMPS)  
4 and gas (NO<sub>x</sub>, O<sub>3</sub> and PTR-MS (when available) phase instruments sampled from the smog  
5 chamber to make sure that smog chamber was sufficiently clean. PTR-MS measurements  
6 during the blank experiment show a total concentration of light aromatics of less than 1 ppb.

## 7 **Vehicles**

8 In total six gasoline passenger vehicles were tested at idling, the three cars selected  
9 represented three different European emission classes. All tested vehicles used three way  
10 catalysts. In the idling case, the cars were driven on a specified circuit until an engine  
11 temperature of 55 ±5 °C was reached. In this case neither the engine nor the catalyst had  
12 reached optimum operating temperature. Figure S2 shows the concentration of total-  
13 hydrocarbons during a cold idling experiment (I3), measured with a flame ionization detector  
14 (FID), calibrated with isobutene. In most experiments there was no systematic increase or  
15 decrease in the THC levels in the exhaust with time.

16 Table S1. Technical data of the three gasoline light duty vehicles used

| European<br>emission<br>standard class | Power (kW) | Odometer (km) | Displacement (cm <sup>3</sup> ) | Weight (kg) |
|----------------------------------------|------------|---------------|---------------------------------|-------------|
| EURO2                                  | 118        | 220 000       | 1948                            | 1400        |
| EURO3                                  | 115        | 180 000       | 1998                            | 1426        |
| EURO4                                  | 48         | 60 000        | 998                             | 1050        |

17

18

19

20

21

22

23

1 Table S2. Experimental conditions

| Experiment | Total exhaust dilution | Ambient temperature °C |
|------------|------------------------|------------------------|
| I1         | 31                     | -2                     |
| I2         | 109                    | -4                     |
| I3         | 90                     | -2                     |
| I4         | 78                     | -5                     |
| I5         | 27                     | 3                      |
| S1         | ~1600                  | -5                     |

2

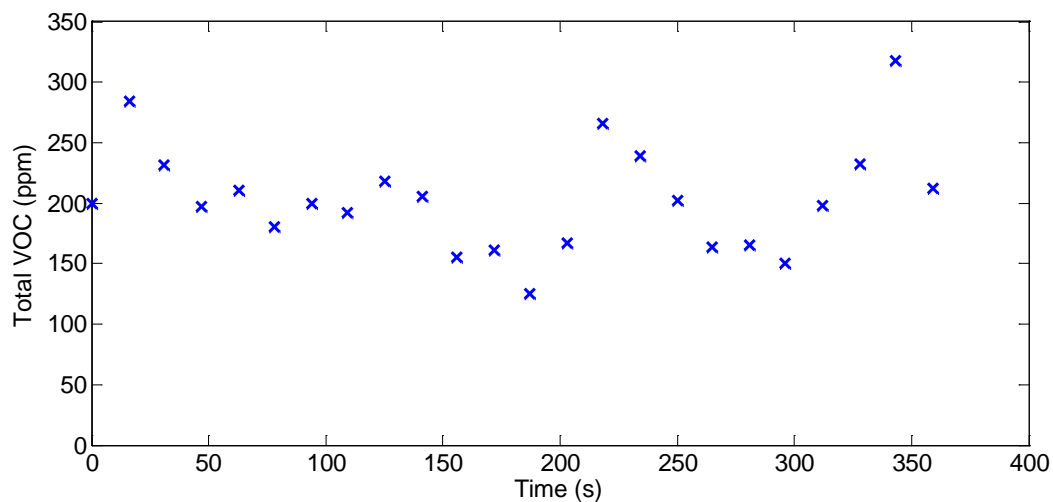

3

4 Figure S2: The concentration of total hydrocarbons in the undiluted exhaust as a function of time,  
5 experiment I3. The gasoline exhaust was added to the chamber for six minutes under idling conditions  
6 from an initial engine temperature of 55 °C using the Euro 2 vehicle.

### 7 Experimental procedure

8 During the experiments the surrounding steel chamber was constantly flushed with pure air (5  
9 air exchanges h<sup>-1</sup>). To avoid leaks into the smog chamber from the surrounding steel room, an  
10 overpressure was maintained in the smog chamber by manually elevating the floor and  
11 lowering the roof of the smog chamber.

### 12 Results

13 Figure S2 shows a comparison between PTR-MS and GC-MS measurements. The average  
14 ratio between the PTR-MS and GC-MS mixing ratio for each light aromatic is slightly lower

1 than 1 for toluene and xylenes, while it is higher for benzene and C<sub>9</sub> aromatics where the  
2 latter has an average ratio of 1.2.

3

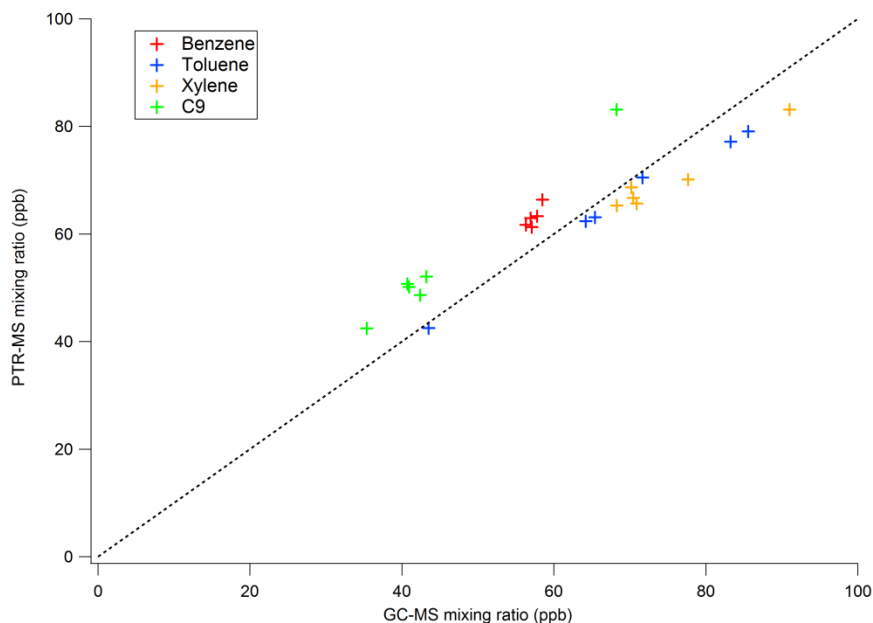

4

5 Figure S3. A comparison between PTR-MS and GC-MS for C<sub>6</sub>-C<sub>9</sub> aromatics measured in the  
6 smog chamber. The broken line shows a ratio of 1.

7 The PTR-MS method is based on reactions of hydronium ions (H<sub>3</sub>O<sup>+</sup>) with gaseous  
8 compounds having a larger proton affinity than that of H<sub>2</sub>O, which results in a non-  
9 dissociative proton transfer to a majority of the VOCs. The PTR-MS consists of a discharge  
10 ion source to produce the primary ions, a drift-tube reactor, where the proton transfer reaction  
11 between H<sub>3</sub>O<sup>+</sup> and the target VOC takes place and a quadrupole mass spectrometer for the  
12 detection of reagent and product ions. Evidence of weak fragmentation of C<sub>7</sub> and C<sub>8</sub>  
13 compounds was found as suggested by a slightly larger ratio of PTR-MS to GC-MS for  
14 benzene than for toluene and xylenes (Jobson et al., 2010).

15

16

17

18

19

1 Table S3. Chemical composition of the gasoline fuel and the undiluted gasoline exhaust.

| Compound                       | Fuel (ng $\mu\text{g}^{-1}$ ) | Exhaust <sup>a</sup> (mg $\text{m}^{-3}$ ) |
|--------------------------------|-------------------------------|--------------------------------------------|
| methyl tert-butyl ether (MTBE) | 12.3                          | -                                          |
| ethyl tert-butyl ether (ETBE)  | 0.5                           | -                                          |
| benzene                        | 11.7                          | 13.96                                      |
| toluene                        | 117.9                         | 16.02                                      |
| ethylbenzene                   | 19.0                          | 2.83                                       |
| p/m-xylene                     | 72.2                          | 14.49                                      |
| o-xylene                       | 21.1                          | 5.90                                       |
| propylbenzene                  | 5.0                           | 1.06                                       |
| 3-ethyltoluene                 | 13.6                          | 4.32                                       |
| 4-ethyltoluene                 | 5.8                           | 1.99                                       |
| 1,3,5-trimethylbenzene         | 6.8                           | 2.42                                       |
| 2-ethyltoluene                 | 4.6                           | 1.76                                       |
| 1,2,4-trimethylbenzene         | 18.8                          | 10.95                                      |
| 1,2,3-trimethylbenzene         | 3.2                           | 1.72                                       |
| 2,2,4-trimethylpentane         | 112.4                         | 1.14                                       |
| hexane                         | 68.3                          | 2,13                                       |
| heptane                        | 20.7                          | 2.67                                       |
| octane                         | 4.0                           | 1.17                                       |
| sulfur                         | <0.01                         | -                                          |
| ethanol                        | 5 vol%                        | -                                          |

2 <sup>a</sup>Undiluted concentrations, average for experiment I1-I3

3

4

5

6

7

8

9

10

1 Table S4.  $f_{43}$  and  $f_{44}$  fractions, reacted mass fractions and yield relative to m-xylene for the  
 2 pure precursors presented in figure 8. These were used for calculations of the expected  $f_{43}$   
 3 and  $f_{44}$  of gasoline exhaust assuming that all SOA originated from C<sub>6</sub>-C<sub>9</sub> light aromatic  
 4 compounds.

| Compound                              | $f_{43}$ | $f_{44}$ | Reacted mass fraction of (C <sub>6</sub> -C <sub>9</sub> ) LA (average of I1 and I2) | Reference                                                      |
|---------------------------------------|----------|----------|--------------------------------------------------------------------------------------|----------------------------------------------------------------|
| benzene                               | 0.03     | 0.12     | 0.011                                                                                | Ng et al., 2010                                                |
| toluene                               | 0.130    | 0.120    | 0.115                                                                                | Chhabra et al., 2011                                           |
| ethylbenzene                          | 0.023    | 0.122    | 0.016                                                                                | Sato et al., 2010                                              |
| m/o/p-xylene                          | 0.170    | 0.095    | 0.344 <sup>a</sup>                                                                   | Exp. P2 this study                                             |
| 1,3,5-trimethylbenzene                | 0.175    | 0.055    | 0.100                                                                                | Ng et al., 2010                                                |
| 1,2,4-trimethylbenzene                | 0.197    | 0.088    | 0.230                                                                                | Derived from experiment P1                                     |
| 1,2,3-trimethylbenzene                | 0.197    | 0.088    | 0.047                                                                                | Assumed to be same as 1,2,4-tmb                                |
| 2/3/4-ethyltoluene and propyl benzene | 0.110    | 0.105    | 0.137                                                                                | Assumed as the mean of ethylbenzene and 1,2,4-trimethylbenzene |
| naphthalene <sup>b</sup>              | 0.01     | 0.1      | -                                                                                    | Chhabra et al., 2011                                           |

5 <sup>a</sup>All xylenes are assumed to have the same  $f_{43}$  and  $f_{44}$  as measured for m-xylene in exp. P2.

6 <sup>b</sup>Not included in calculation, given here for reference.

### 7 **Expected $f_{43}$ and $f_{44}$ assuming additive SOA composition and yield for C<sub>6</sub>-C<sub>9</sub> Light** 8 **aromatics**

9 First we note that the  $f_{43}$  and  $f_{44}$  fractions for m-xylene in experiment P2 were within 0.02  
 10 of values from several studies in the literature (Ng et al. 2010, Chhabra et al. 2011, Loza et al.  
 11 2012) suggesting that these measurements are typically repeatable between instruments and  
 12 set-ups. In Table S4 we list literature values for the most important C<sub>6</sub>-C<sub>9</sub> light aromatic  
 13 precursors, for compounds with no available literature data we had to make assumptions  
 14 based on the structure of the component. For example, the three xylene isomers were assumed  
 15 to have the same  $f_{43}$  and  $f_{44}$  fractions as found for m-xylene. This is supported by a study

1 with the potential aerosol mass chamber which showed that the  $f_{43}$  and  $f_{44}$  fractions of SOA  
 2 from p- and m- xylene varied by less than 0.01 (Kang et al. 2011). The  $f_{43}$  and  $f_{44}$  values for  
 3 1,2,4-trimethylbenzene were derived from experiment P1 (precursor mixture of 1,2,4 TMB,  
 4 m-xylene and toluene), where 1,2,4 TMB constituted more than 60% of the reacted light  
 5 aromatics. We used the  $f_{43}$ ,  $f_{44}$  and yields for toluene and m-xylene given in Table S4 and  
 6 assumed that the mixed SOA was additive in terms of yield and composition.

7 Finally, we estimated the expected  $f_{43}$ ,  $f_{44}$  in each gasoline exhaust experiment if assuming  
 8 additive yield and composition. The SOA contribution from each component was first  
 9 calculated from the reacted mass fraction and yield using the high and low yield aromatic  
 10 classes from Odum et al. (1997). Then the  $f_{43}$  and  $f_{44}$  fractions were calculated as the  
 11 weighted sum of the thirteen different components in table S4. The resulting “expected”  $f_{43}$   
 12 and  $f_{44}$  are given in table S5.

13 Table S5. The expected and measured  $f_{43}$  and  $f_{44}$  for the six gasoline exhaust experiments.  
 14 The expected  $f_{43}$  and  $f_{44}$  figures are based on the assumption that the SOA was produced  
 15 only from light aromatics (C<sub>6</sub>-C<sub>9</sub>) and that the mass spectra of the gasoline exhaust can be  
 16 calculated as the weighted mean of the SOA from each precursor. The  $f_{43}$  and  $f_{44}$  figures for  
 17 13 pure C<sub>6</sub>-C<sub>9</sub> light aromatic precursors (table S4) are used together with the GC-MS data of  
 18 the reacted concentration for those precursors to calculate the expected  $f_{43}$  and  $f_{44}$ . Benzene,  
 19 toluene, ethyl-benzene, propyl benzene and the ethyl-toluenes were assumed to have twice as  
 20 high yield as m-xylene (Odum et al., 1997).

| Exp. | Expected<br>$f_{43}$ | Expected<br>$f_{44}$ | Measured <sup>a</sup><br>$f_{43}$ | Measured <sup>a</sup><br>$f_{44}$ | Maximum fraction of<br>C <sub>6</sub> -C <sub>9</sub> contribution to<br>SOA <sup>b</sup> |
|------|----------------------|----------------------|-----------------------------------|-----------------------------------|-------------------------------------------------------------------------------------------|
| I1   | 0.145                | 0.099                | 0.088                             | 0.114                             | 0.61                                                                                      |
| I2   | 0.148                | 0.097                | 0.090                             | 0.130                             | 0.61                                                                                      |
| I3   | 0.158                | 0.093                | 0.086                             | 0.090                             | 0.54                                                                                      |
| I4   | 0.138                | 0.103                | 0.080                             | 0.130                             | 0.58                                                                                      |
| I5   | 0.157                | 0.097                | 0.081                             | 0.107                             | 0.52                                                                                      |
| S1   | 0.142                | 0.101                | 0.148                             | 0.095                             | 1.04                                                                                      |

21 <sup>a</sup>POA subtracted

22 <sup>b</sup>Based on the ratio between the measured and expected  $f_{43}$ .



1 Table S6. Estimations of potential SOA formed from C<sub>10</sub>, C<sub>11</sub> light aromatics and  
 2 naphthalene. For C<sub>10</sub> light aromatics, the reacted concentration was estimated from PTR-MS  
 3 measurements. For C<sub>11</sub> light aromatics and naphthalene the initial concentration was first  
 4 estimated using PTR-MS and the reacted concentration was calculated using  $k_{OH} = 5.67 \cdot 10^{-11}$   
 5 (C<sub>11</sub>) and  $k_{OH} = 2.44 \cdot 10^{-11}$  (naphthalene) (The Master Chemical Mechanism). The yield  
 6 curves for C<sub>10</sub> and C<sub>11</sub> were assumed to be identical to m-xylene (according to the fit in figure  
 7 5), while the yield for naphthalene is assumed to be three times the yield for m-xylene.

| Exp. Id | Initial concentration of C <sub>10</sub> / C <sub>11</sub> / naphthalene (ppb) | Reacted conc. C <sub>10</sub> / C <sub>11</sub> / naphthalene ( $\mu\text{g m}^{-3}$ ) | Estimated formed SOA C <sub>10</sub> / C <sub>11</sub> / naphthalene ( $\mu\text{g m}^{-3}$ ) |
|---------|--------------------------------------------------------------------------------|----------------------------------------------------------------------------------------|-----------------------------------------------------------------------------------------------|
| I1      | 13.4/1.1/2.8                                                                   | 30.7/2.6/3.6                                                                           | 2.5/0.2/0.9                                                                                   |
| I2      | 17.7/1.6/4.4                                                                   | 40.1/5.9/6.0                                                                           | 4.6/0.7/2.1                                                                                   |
| S1      | 4.4/0.2/0.2                                                                    | 12.6/0.4/0.2                                                                           | 0.8/<0.1/<0.1                                                                                 |

8  
9  
10

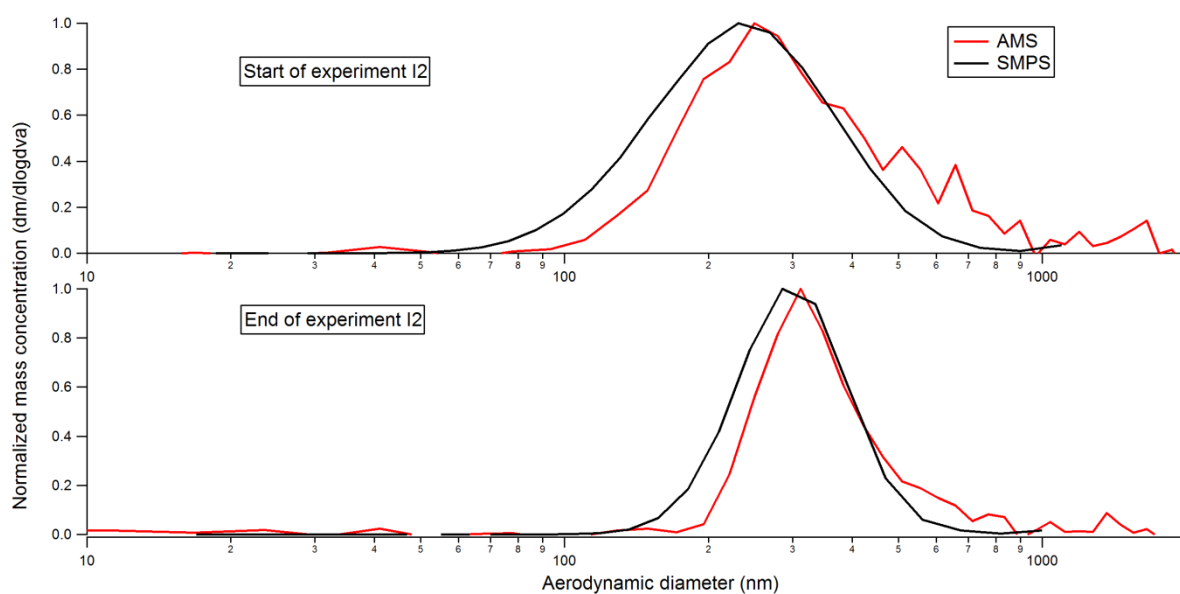

11  
12 Figure S4. The normalized mass size distribution for SMPS and AMS at the start (before UV  
 13 lights) and end of experiment I2. The SMPS volume size distribution is converted to mass  
 14 size distribution by multiplying the volume with the density of the mixture calculated from

1 the AMS-data. The SMPS mobility diameter size channels have been converted to vacuum  
2 aerodynamic diameters also using the density of the mixture.

3

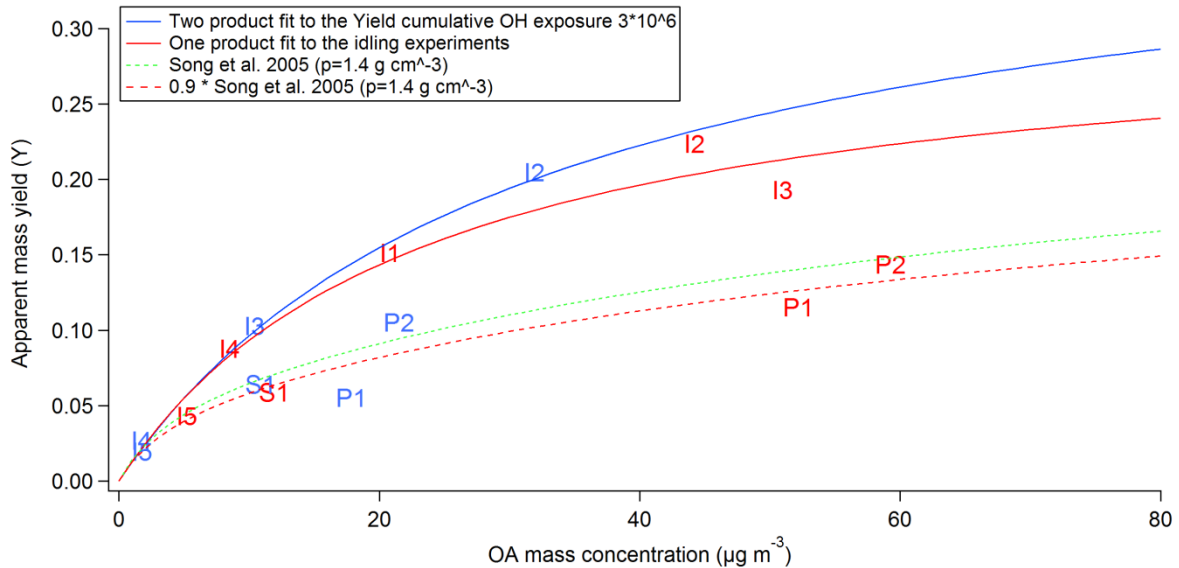

4

5 Figure S5. The apparent mass yield for the gasoline exhaust and precursor experiment, end of  
6 each experiment (red symbols) and at a cumulative OH exposure of  $3 * 10^6 \text{ cm}^{-3} \text{ h}$  (blue  
7 symbols). A one product fit (red solid line) is applied to the yield data at the end of the idling  
8 experiments (same as figure 5 in the main paper). A two product fit is applied to the yield data  
9 at cumulative OH exposure of  $3 * 10^6 \text{ cm}^{-3} \text{ h}$  (blue solid line) the fitting parameters is  
10  $a_1=0.3799$ ,  $a_2=0.048$ ,  $k_1=0.0332$  and  $k_2= 0.0035$ . The green and red broken lines are a two  
11 product fit to the m-xylene yield from Song et al. (2005), (assuming a SOA density of  $1.4 \text{ g}$   
12  $\text{cm}^{-3}$ ).

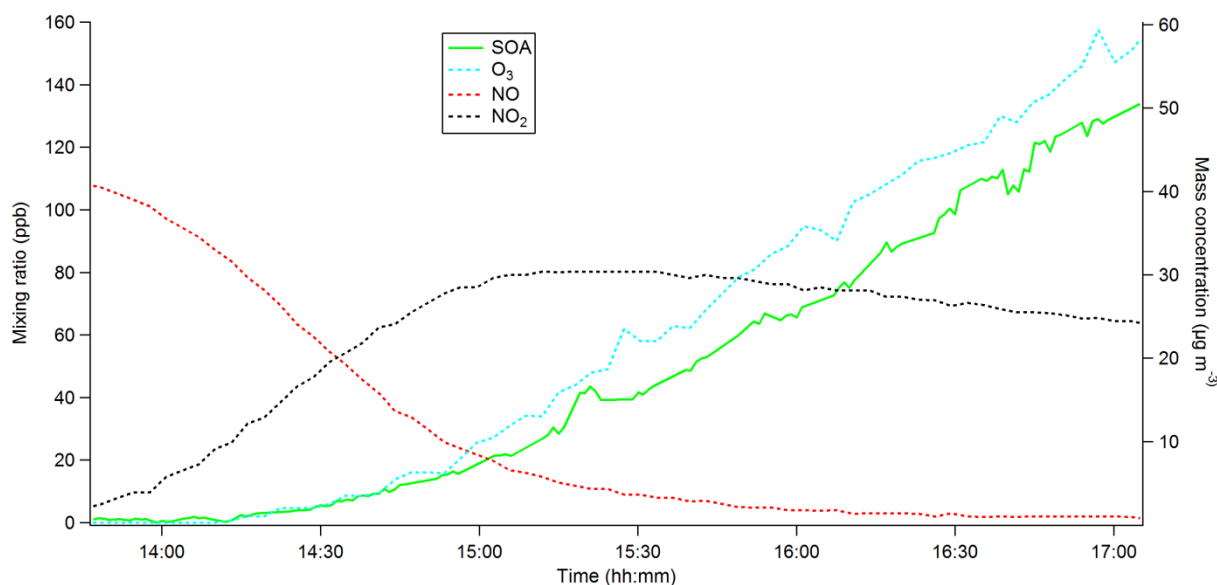

1

2 Figure S6. Ozone, NO, NO<sub>2</sub> concentrations together with the wall loss corrected SOA mass  
 3 concentration as a function of time in experiment I3. The data shows evidence of SOA  
 4 production in the presence of NO, in contrast to the precursor experiments (e.g. Fig 3). UV-  
 5 lights were turned on at 13:42.

## 6 References

7 Chhabra, P. S., Ng, N. L., Canagaratna, M. R., Corrigan, A. L., Russell, L. M., Worsnop, D.  
 8 R., Flagan, R. C. and Seinfeld, J. H. (2011). *Elemental composition and oxidation of*  
 9 *chamber organic aerosol*. *Atmos Chem Phys* **11**(17): 8827-8845.

10

11 Jobson, B. T., Volkamer, R. A., Velasco, E., Allwine, G., Westberg, H., Lamb, B. K.,  
 12 Alexander, M. L., Berkowitz, C. M. and Molina, L. T. (2010). *Comparison of*  
 13 *aromatic hydrocarbon measurements made by PTR-MS, DOAS and GC-FID during*  
 14 *the MCMA 2003 Field Experiment*. *Atmos Chem Phys* **10**(4): 1989-2005.

15 Kang, E., Toohey, D. W. and Brune, W. H. (2011). *Dependence of SOA oxidation on organic*  
 16 *aerosol mass concentration and OH exposure: experimental PAM chamber studies*.  
 17 *Atmos Chem Phys* **11**(4): 1837-1852.

18

19 Loza, C. L., Chhabra, P. S., Yee, L. D., Craven, J. S., Flagan, R. C. and Seinfeld, J. H. (2012).  
 20 *Chemical aging of m-xylene secondary organic aerosol: laboratory chamber study*.  
 21 *Atmos Chem Phys* **12**(1): 151-167.

22

23 Ng, N. L., Canagaratna, M. R., Zhang, Q., Jimenez, J. L., Tian, J., Ulbrich, I. M., Kroll, J. H.,  
 24 Docherty, K. S., Chhabra, P. S., Bahreini, R., Murphy, S. M., Seinfeld, J. H.,  
 25 Hildebrandt, L., Donahue, N. M., DeCarlo, P. F., Lanz, V. A., Prevot, A. S. H., Dinar,  
 26 E., Rudich, Y. and Worsnop, D. R. (2010). *Organic aerosol components observed in*

- 1            *Northern Hemispheric datasets from Aerosol Mass Spectrometry.* Atmos Chem Phys  
2            **10**(10): 4625-4641.
- 3
- 4    Odum, J. R., Jungkamp, T. P. W., Griffin, R. J., Forstner, H. J. L., Flagan, R. C. and Seinfeld,  
5            J. H. (1997). *Aromatics, reformulated gasoline, and atmospheric organic aerosol*  
6            *formation.* Environ Sci Technol **31**(7): 1890-1897.
- 7
- 8    Sato, K., Takami, A., Isozaki, T., Hikida, T., Shimono, A. and Imamura, T. (2010). *Mass*  
9            *spectrometric study of secondary organic aerosol formed from the photo-oxidation of*  
10           *aromatic hydrocarbons.* Atmos Environ **44**(8): 1080-1087.
- 11   Song, C., Na, K. S. and Cocker, D. R. (2005). *Impact of the hydrocarbon to NO<sub>x</sub> ratio on*  
12           *secondary organic aerosol formation.* Environ Sci Technol **39**(9): 3143-3149.
- 13   The Master Chemical Mechanism: <http://mcm.leeds.ac.uk/MCM/>, last access: 13<sup>th</sup> November  
14   2012
